# Supplementary material for: High performance fiber-shaped perovskite solar cells based on lead acetate precursor
Source: Royal Society of Chemistry journal article supplement (doi:10.1039/c7se00462a), 2017-10-23
Supplement: c7se00462a1.pdf [file c7se00462a1.pdf]

Table S1 Photovoltaic characteristics of FPSCs with different annealing durations.

| <b>Annealing durations</b> | $V_{oc}$ (V) | $J_{sc}$ (mA/cm <sup>2</sup> ) | FF   | PCE (%) |
|----------------------------|--------------|--------------------------------|------|---------|
| 5 min                      | 0.58         | 5.90                           | 0.48 | 1.64    |
| 10 min                     | 0.69         | 4.47                           | 0.56 | 1.73    |
| 20 min                     | 0.81         | 11.20                          | 0.61 | 5.53    |
| 40 min                     | 0.89         | 12.69                          | 0.58 | 6.55    |
| 60 min                     | 0.76         | 4.21                           | 0.65 | 2.08    |

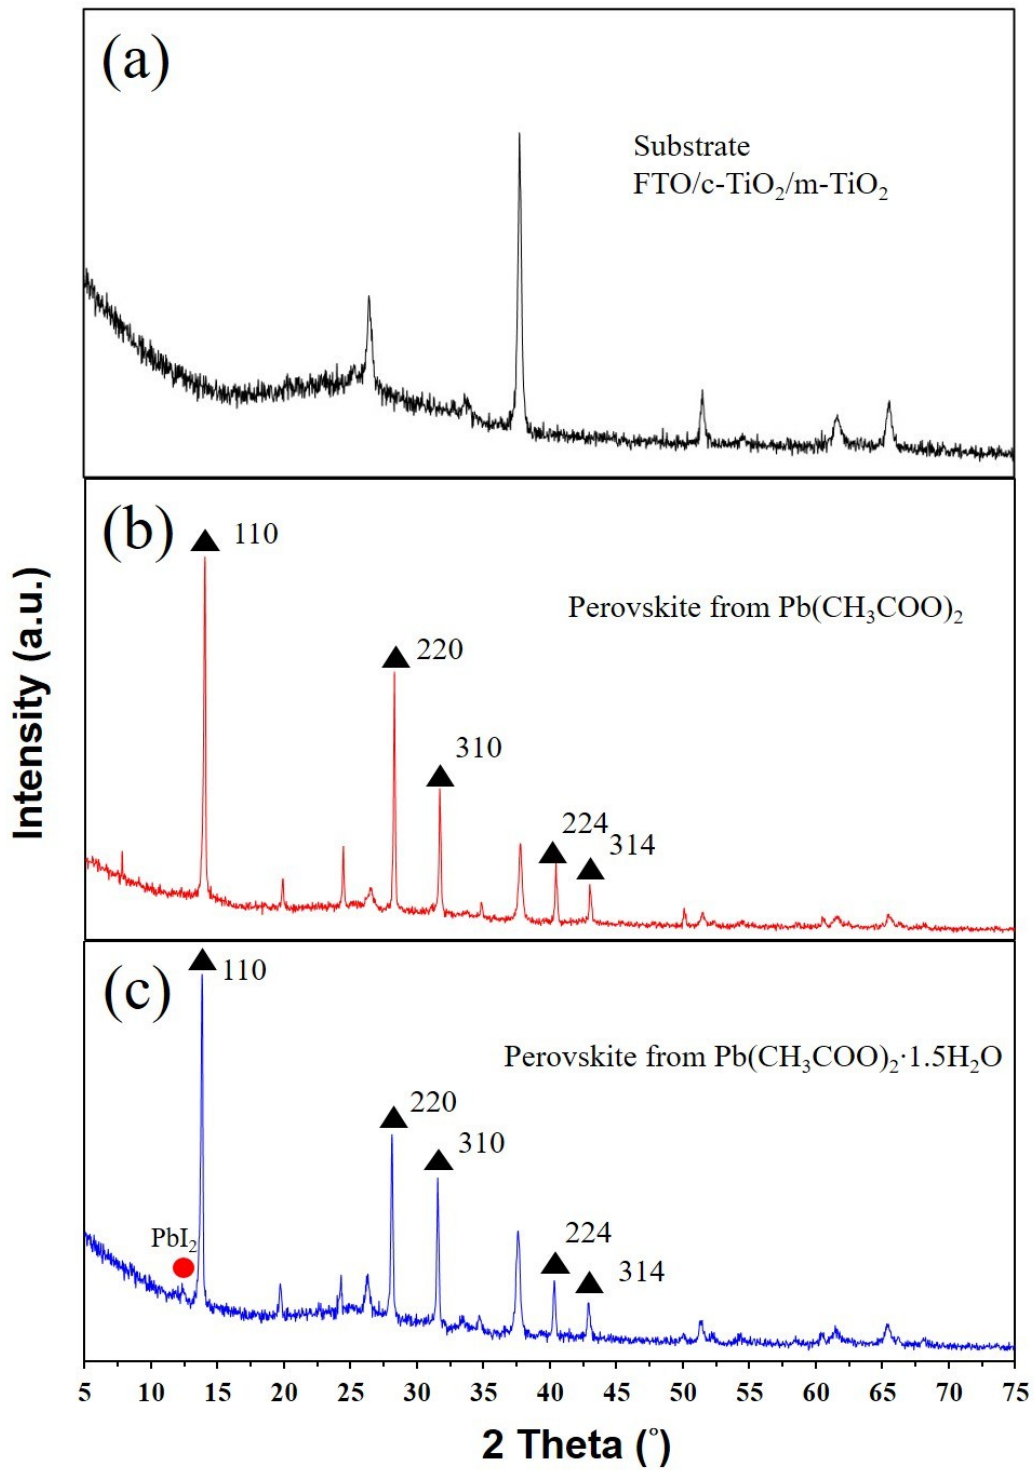

Fig. S1 X-ray diffraction spectra of (a) FTO/c-TiO<sub>2</sub>/m-TiO<sub>2</sub> substrate, and the perovskite film by (b) Pb(CH<sub>3</sub>COO)<sub>2</sub>, (c) Pb(CH<sub>3</sub>COO)<sub>2</sub>·1.5H<sub>2</sub>O as lead source.

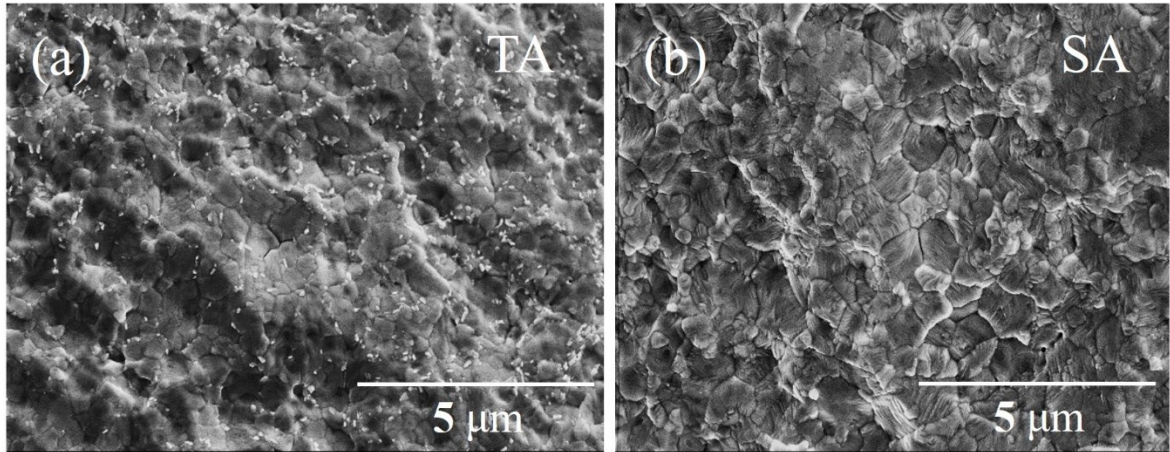

Fig. S2 The surface morphology of perovskite film by (a) thermal annealing, (b) solvent annealing.
